# Supplementary material for: A cyclometallated fluorenyl Ir(iii) complex as a potential sensitiser for two-photon excited photodynamic therapy (2PE-PDT)
Source: Royal Society of Chemistry journal article supplement (doi:10.1039/c5dt01855b), 2015-01-01
Supplement: c5dt01855b1.pdf [file c5dt01855b1.pdf]

## Electronic Supplementary Information

### A Cyclometallated Fluorenyl Ir(III) Complex as a Potential Sensitiser for Two-Photon Excited Photodynamic Therapy (2PE-PDT)

Elizabeth Boreham,<sup>a,b</sup> Lucy Jones,<sup>a,b</sup> Adam Swinburne,<sup>a,b</sup> Mireille Blanchard-Desce,<sup>c</sup>  
Vincent Hugues,<sup>c</sup> Christine Terryn,<sup>d</sup> Fabien Miomandre,<sup>e</sup> Gilles Lemerrier<sup>f,g,\*</sup> and  
Louise S. Natrajan<sup>a,b,\*</sup>

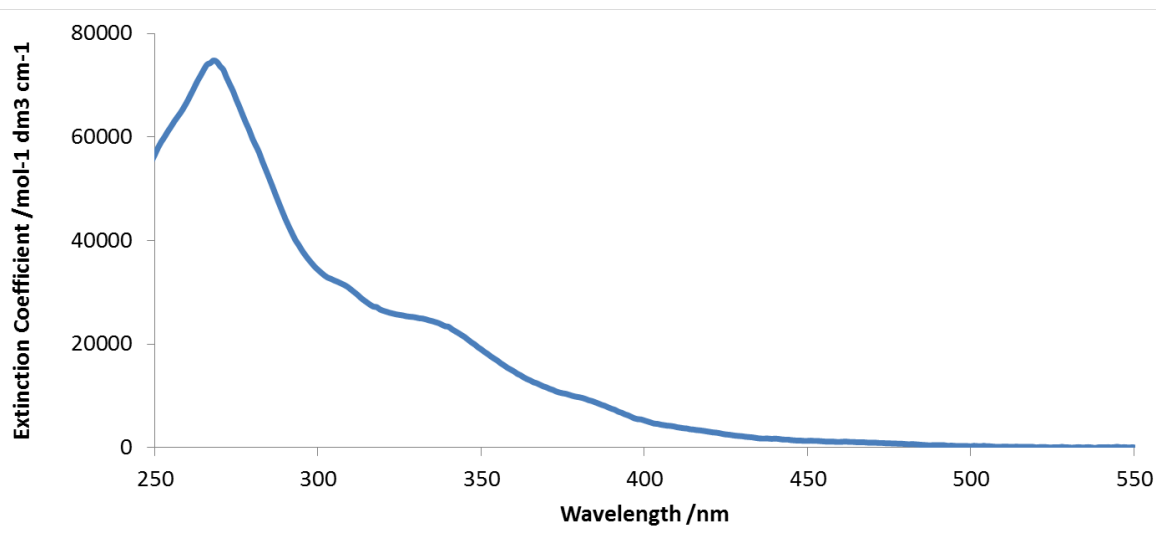

Figure 1. Electronic absorption spectrum of **IrppyL1** in degassed acetonitrile solution at  $2 \times 10^{-5}$  M concentration

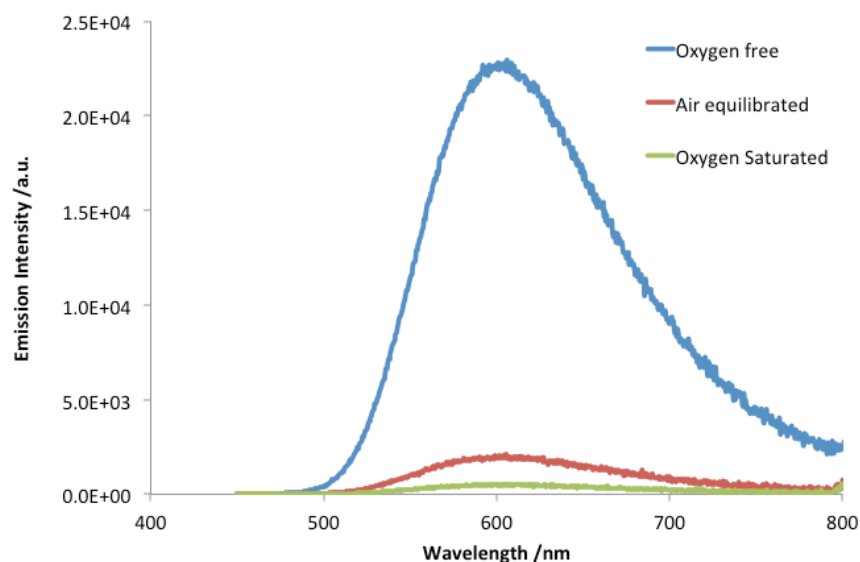

Figure 2. Emission spectra of **IrppyL1** in a degassed (oxygen free) acetonitrile solution, an air equilibrated solution and an oxygen saturated solution.

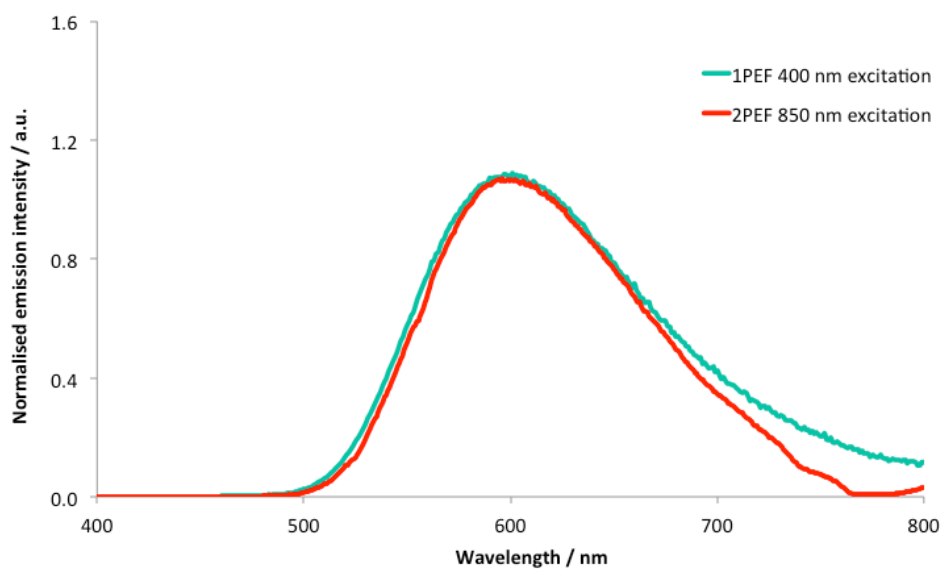

Figure 3. The emission profile of **IrppyL1** in acetonitrile solution from single-photon (400 nm) excitation and two-photon (850 nm) excitation are the superimposable, indicating that the same excited state is reached by either excitation method.

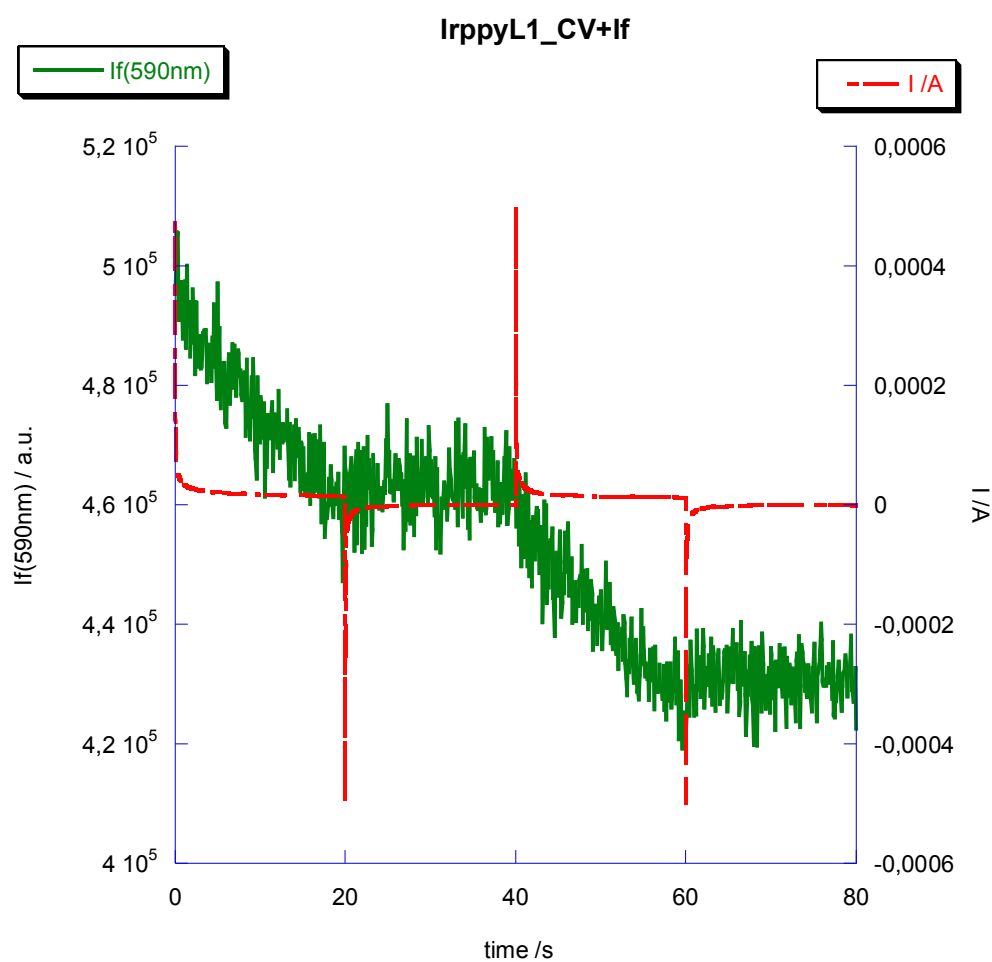

Figure 4. Two cycles of oxidation and reduction of **IrppyL1** in the spectro-electrochemical cell measuring current (red dashed trace) and emission intensity (green trace) at 590 nm against time as the voltage is scanned at a rate of  $5 \text{ mVs}^{-1}$ . After each oxidation the emission intensity is reduced and not recovered after reduction.
